# Supplementary material for: Partial weight reduction protocols in cats lead to better weight outcomes, compared with complete protocols, in cats with obesity
Source: Front Vet Sci. 2023 Jun 20;10:1211543. doi: 10.3389/fvets.2023.1211543 (PMC10318927; doi:10.3389/fvets.2023.1211543)
Supplement: Supplementary file 1 [file Table_1.XLSX]

## Sheet: weight loss, body comp, nutrien
Complete data for all cats in the study: Details of signalment, weight loss outcomes, body composition and all nutrient intakes
case_no	breed	sex	age	duration	diet	full_v_partial	start_weight	final_weight	percent_above_ideal	visits	diet_changes	stalls	fat_pre	lean_pre	bmc_pre	total_mass_pre	fat_post	lean_post	bmc_post	total_mass_post	ideal_weight	percent_wt_loss	rate_wt_loss	av_energy_day	av_dry	av_wet	percent_dry	percent_wet	EI_MBW	arginine	histidine	isoleucine	methionine	met_cyst	leucine	lysine	phenylalanine	phenyl_tyro	threonine	tryptophan	valine	taurine	linoleic_acid	arachidonic_acid	epa_dha	calcium	phosphorus	magnesium	sodium
F1	DSH	Mn	96	145	d1	F	8.05	6	34.1667	10	1	0	3094	4379	178.3	7651.3	1068	4452	165.9	5685.9	6	25.4658	1.22939	170.047	57.4483	0	100	0	58.6986	0.373271	0.136565	0.255164	0.126572	0.228953	0.532018	0.295948	0.27577	0.493487	0.241007	0.0638767	0.306044	0.0332294	0.34836	0.0272986	0.0132241	0.217194	0.198944	14.8304	83.6633
F3	DSH	Mn	123	363	d1	F	7.55	5.1	48.0392	15	1	1	2710	4383	166.2	7259.2	1085	3443	141.3	4669.3	5.1	32.4503	0.625764	179.883	60.7713	0	100	0	65.8215	0.440287	0.161084	0.300976	0.149296	0.270058	0.627534	0.349081	0.32528	0.582086	0.284276	0.0753448	0.36099	0.0391952	0.410903	0.0321996	0.0155983	0.256188	0.234662	17.493	98.6839
F4	DSH	Mn	134	141	d1	P	6.3	5	26	11	2	1	5790	3396	143.9	9329.9	1273	3228	130.9	4631.9	4.2	20.6349	1.02443	157.027	53.0496	0	100	0	61.2469	0.437738	0.160151	0.299233	0.148432	0.268495	0.623901	0.34706	0.323397	0.578716	0.28263	0.0749087	0.3589	0.0389683	0.408525	0.0320132	0.015508	0.254705	0.233303	17.3917	98.1126
F9	DSH	Mn	156	366	d1w1	P	8.5	5.9	60.3774	19	3	1	2394	3396	143.9	5933.9	1719	3659	121.3	5499.3	5.3	30.5882	0.585021	152.873	48.4699	15.1639	94.5939	5.40608	56.8927	0.364593	0.134177	0.247805	0.124579	0.225034	0.517273	0.296144	0.269464	0.481926	0.236941	0.0631259	0.300205	0.0366785	0.340628	0.0265007	0.0143391	0.212439	0.193021	14.1862	84.6621
F14	DSH	Fn	132	336	d1w1	F	6.9	5.3	38	20	6	4	2760	3618	132.2	6510.2	NA	NA	NA	NA	5	23.1884	0.483092	136.468	29.5685	78.9435	67.2171	32.7829	50.7868	0.338148	0.127974	0.223427	0.119804	0.215011	0.469095	0.306405	0.250392	0.446573	0.226649	0.0618409	0.284154	0.0529556	0.31757	0.0238463	0.0196796	0.198354	0.173197	11.8138	91.727
F20	DSH	Mn	86	490	d1	F	10.3	6.45	59.6899	25	3	6	4172	5543	197.5	9912.5	1261	4508	178.2	5947.2	6.45	37.3786	0.533981	200.774	66.4184	6.73469	98.1814	1.81861	65.5117	0.41985	0.153913	0.28645	0.142736	0.25807	0.597481	0.335633	0.310223	0.555033	0.271679	0.0721335	0.344731	0.0390197	0.391974	0.0306415	0.0154281	0.244411	0.223264	16.5644	95.2496
F24	DSH	Mn	67	195	d1w1	F	5.45	4.5	15.9574	8	2	1	1277	3605	146.5	5028.5	284	3675	125.8	4084.8	4.7	17.4312	0.625735	106.507	32.9744	14.359	92.6314	7.3686	42.8375	0.275289	0.101525	0.18672	0.0943219	0.170295	0.389926	0.225525	0.203489	0.363857	0.179321	0.0478628	0.227018	0.0288394	0.257294	0.0199652	0.0112126	0.160484	0.145389	10.6301	64.7232
F25	DSH	Fn	79	195	d1w1	F	6.1	5	22	8	2	0	1789	3667	150.5	5606.5	618	3690	139.7	4447.7	5	18.0328	0.647331	112.882	35.1282	14.359	93.0518	6.9482	43.5846	0.279922	0.103187	0.189947	0.0958536	0.173078	0.39663	0.228904	0.206908	0.369987	0.182248	0.0486252	0.230764	0.029076	0.261603	0.0203109	0.0113175	0.163168	0.147913	10.8267	65.6391
F31	DSH	Fn	132	195	d1w1	F	5.9	4.55	29.6703	11	2	2	1713	3597	118.6	5428.6	612	3346	102.3	4060.3	4.55	22.8814	0.821382	129.618	28	75.3846	67.0323	32.9677	49.5626	0.342124	0.129502	0.226013	0.121241	0.217581	0.474542	0.310217	0.25334	0.451822	0.22936	0.0625898	0.287533	0.0537029	0.321315	0.0241219	0.019953	0.200696	0.175195	11.9439	92.8925
F32	DSH	Fn	150	796	d1w1	F	9.7	6.5	53.9683	40	13	13	3600	5539	154.1	9293.1	1533	4409	150.6	6092.6	6.3	32.9897	0.29011	180.631	32.0603	138.279	55.9317	44.0683	56.0894	0.383251	0.146607	0.250393	0.137671	0.246479	0.526944	0.361331	0.284	0.505962	0.259934	0.071548	0.32459	0.0684052	0.360658	0.0267027	0.0251301	0.225398	0.19372	12.7947	109.81
F33	DSH	Mn	43	133	d1	F	5.9	4.8	22.9167	9	2	0	1418	3912	140.9	5470.9	537	3761	130.4	4428.4	4.8	18.6441	0.981267	132.109	44.6316	0	100	0	51.5281	0.336759	0.123207	0.230205	0.114191	0.206558	0.479978	0.266999	0.248795	0.445216	0.217432	0.0576285	0.276108	0.029979	0.314285	0.0246283	0.0119306	0.195949	0.179484	13.3798	75.4797
F40	DSH	Fn	54	212	d1w1	F	6.5	5.45	19.2661	7	0	1	1905	4036	157	6098	872	3956	148.3	4976.3	5.45	16.1538	0.533382	180.4	40	100	68.6489	31.3511	63.1096	0.421945	0.159466	0.279198	0.149225	0.267897	0.586014	0.380339	0.312413	0.557264	0.282382	0.0769586	0.354211	0.0648869	0.396164	0.0298018	0.0241549	0.247426	0.216484	14.826	113.627
F41	DSH	Mn	72	124	d1w1	F	6.8	5.7	19.2982	6	0	0	1867	4249	170.6	6286.6	665	4451	154.5	5270.5	5.7	16.1765	0.913188	180.4	40	100	68.6489	31.3511	59.5357	0.409454	0.154745	0.270933	0.144808	0.259967	0.568666	0.36908	0.303165	0.540768	0.274023	0.0746804	0.343725	0.0629661	0.384436	0.0289195	0.0234399	0.240101	0.210075	14.3871	110.263
F42	DSH	Mn	128	447	d2w1	F	7	5.95	17.6471	19	2	5	1868	4612	152.8	6632.8	1050	4328	146.1	5524.1	5.95	15	0.234899	170.183	45.66	24.8322	87.1947	12.8053	45.6192	0.273536	0.100168	0.182113	0.094798	0.16456	0.383649	0.204086	0.213591	0.371179	0.178752	0.0474637	0.223463	0.0461497	0.260908	0.0187729	0.0126827	0.19323	0.165662	11.5493	87.3474
F43	DSH	Fn	115	364	d2	F	7	5	40	20	5	3	2431	3948	115.9	6494.9	964	3408	108.8	4480.8	5	28.5714	0.549451	174.855	51.5797	0	100	0	51.9877	0.306752	0.110959	0.205877	0.103805	0.18007	0.434558	0.213663	0.241177	0.416513	0.198729	0.0521421	0.248516	0.0422806	0.300751	0.0220814	0.0126997	0.221705	0.190369	13.3596	95.0459
F44	DSH	Mn	96	122	d2	F	6.6	5.35	23.3645	7	1	0	1764	4190	167.4	6121.4	828	3835	162.2	4825.2	5.35	18.9394	1.08669	206.179	60.8197	0	100	0	57.5086	0.345673	0.125038	0.231999	0.116976	0.202918	0.489696	0.240773	0.271778	0.469361	0.223945	0.058758	0.280048	0.0476452	0.338911	0.0248831	0.0143111	0.249836	0.214523	15.0547	107.106
F46	DSH	Mn	84	301	d2	F	6.7	5.4	34	13	2	2	2075	4016	144.9	6235.9	1126	3758	133.1	5017.1	5	19.403	0.451232	175.106	34.8837	91.6944	58.4862	41.5138	54.4982	0.339662	0.127941	0.221858	0.124206	0.215937	0.465185	0.292842	0.260948	0.460229	0.226446	0.0617507	0.28288	0.0818646	0.302823	0.0206438	0.0196969	0.22695	0.193809	13.2837	116.002
F50	DSH	Mn	109	575	d2w1	F	8.1	5.75	40.8696	16	6	2	2498	5112	156.1	7766.1	880	4344	136.6	5360.6	5.75	29.0123	0.353194	219.198	43.9061	113.478	58.8955	41.1045	57.1946	0.386761	0.145622	0.252694	0.14132	0.245685	0.529877	0.332789	0.297203	0.524058	0.25777	0.0702662	0.322015	0.0928055	0.345168	0.0235509	0.0223621	0.258637	0.220882	15.1434	131.961
F59	DSH	Mn	48	183	d2w1	F	9.4	7.35	34.2857	13	5	1	3078	5720	200.9	8998.9	1595	5182	192.9	6969.9	7	21.8085	0.834205	183.116	44.6721	51.0929	76.4031	23.5969	44.5386	0.270847	0.10023	0.179064	0.0957751	0.166353	0.376581	0.213674	0.210233	0.36733	0.178313	0.0478245	0.222853	0.0529192	0.25212	0.0178039	0.0137193	0.187509	0.160533	11.1247	88.7061
F60	DSH	Mn	47	183	d2w1	F	6.3	5.25	20	13	5	4	1584	4074	163	5821	668	4042	156.1	4866.1	5.25	16.6667	0.637523	179.515	50.6557	12.5683	93.7208	6.27919	51.6508	0.309106	0.112484	0.206647	0.105831	0.183647	0.435772	0.222766	0.242218	0.419581	0.201103	0.0530749	0.251445	0.0472545	0.299054	0.0217459	0.0135447	0.220947	0.189577	13.262	97.2027
F67	DSH	Fn	110	322	d2w1	F	5.5	4.05	35.8025	7	3	0	1414	3437	126.2	4977.2	195	3263	119	3577	4.05	26.3636	0.573123	165.201	35.8385	70.4969	65.3092	34.6908	57.3083	0.36251	0.135623	0.237892	0.130876	0.227452	0.499385	0.302309	0.279611	0.491363	0.240515	0.0651743	0.300508	0.0809975	0.328684	0.0227247	0.0199971	0.245588	0.209934	14.4517	121.848
F69	DSH	Mn	67	119	d2	F	7.7	6.7	14.9254	9	0	0	1604	5438	192.8	7234.8	1097	5047	184.4	6328.4	6.7	12.987	0.763942	220.35	65	0	100	0	52.7978	0.317732	0.114931	0.213246	0.107521	0.186516	0.450114	0.221312	0.24981	0.431423	0.205843	0.0540087	0.257412	0.0437941	0.311517	0.0228719	0.0131543	0.229642	0.197183	13.8379	98.4482
F70	DSH	Fn	110	303	d2	F	5	3.7	35.1351	12	1	0	1549	2921	116.4	4586.4	423	2759	104.8	3286.8	3.7	26	0.60066	138.341	40.8086	0	100	0	49.4343	0.296944	0.107411	0.199294	0.100486	0.174313	0.420665	0.206832	0.233466	0.403196	0.192376	0.050475	0.24057	0.0409287	0.291135	0.0213754	0.0122937	0.214617	0.184282	12.9325	92.007
F71	DSH	Mn	62	196	d2w1	F	6.8	5.6	21.4286	15	2	5	1678	4446	156	6280	NA	NA	NA	NA	5.6	17.6471	0.630252	170.131	14	197.857	20.7628	79.2372	51.7564	0.341581	0.133712	0.21704	0.134118	0.233611	0.451908	0.350434	0.256352	0.461865	0.234084	0.0660913	0.292137	0.117178	0.274511	0.0169752	0.0254111	0.209796	0.178016	11.8581	127.355
F73	DSH	Mn	116	967	d2w1	F	6.2	5.1	21.5686	22	3	7	1837	3867	140.1	5844.1	823	3715	129.6	4667.6	5.1	17.7419	0.128432	149.559	31.7378	67.6899	63.4547	36.5453	46.2648	0.282569	0.105911	0.185198	0.10237	0.177929	0.388648	0.2378	0.217717	0.382971	0.187722	0.050956	0.234535	0.0644792	0.255046	0.0175676	0.0158033	0.190721	0.162989	11.207	95.3907
F74	DSH	Fn	151	119	d2w1	F	5.6	4.8	16.6667	7	1	2	1283	3718	127.9	5128.9	900	3295	116.2	4311.2	4.8	14.2857	0.840336	167.922	22.1008	150	35.3014	64.6986	53.911	0.357346	0.137796	0.229567	0.1365	0.23759	0.47934	0.343482	0.270693	0.48358	0.242259	0.0674913	0.302454	0.108178	0.299592	0.0193235	0.0242675	0.2271	0.193213	13.0258	128.81
F76	DSH	Fn	78	530	d2w1	F	8	4.9	63.2653	22	2	1	2918	4467	158.2	7543.2	487	3824	138.2	4449.2	4.9	38.75	0.511792	196.084	39.5528	100	59.4276	40.5724	60.9559	0.384575	0.144722	0.251358	0.140381	0.244047	0.527125	0.330057	0.295616	0.521111	0.256217	0.0698084	0.320079	0.0917507	0.343674	0.0234755	0.0221505	0.257456	0.219891	15.0807	131.052
F77	DLH	Mn	70	477	d2	F	7.5	5.6	33.9286	12	1	0	2360	4504	172.9	7036.9	841	4161	160.4	5162.4	5.6	25.3333	0.371768	216.264	63.7945	0	100	0	58.2128	0.351654	0.127201	0.236013	0.119001	0.206429	0.49817	0.244939	0.276481	0.477482	0.22782	0.0597747	0.284894	0.0484696	0.344775	0.0253137	0.0145587	0.254159	0.218235	15.3152	108.959
F78	DSH	Mn	118	113	d2	F	5	4.5	11.1111	7	0	0	1081	3415	139.1	4635.1	756	3202	132.8	4090.8	4.5	10	0.619469	152.55	45	0	100	0	48.6734	0.287196	0.103885	0.192752	0.0971877	0.16859	0.406855	0.200042	0.225802	0.38996	0.18606	0.048818	0.232673	0.0395851	0.281578	0.0206737	0.0118901	0.207571	0.178233	12.508	88.9867
F80	DSH	Fn	79	426	d2	F	7.2	4.8	50	11	2	1	2416	4249	144.2	6809.2	667	3579	132.9	4378.9	4.8	33.3333	0.547731	172.126	50.7746	0	100	0	51.1763	0.310337	0.112256	0.208283	0.105019	0.182175	0.439638	0.216161	0.243996	0.421381	0.201052	0.0527516	0.25142	0.0427747	0.304266	0.0223395	0.0128482	0.224297	0.192594	13.5158	96.1568
F82	DSH	Mn	97	209	d2w1	F	6.8	5.78	17.6471	7	1	0	1991	4289	167.4	6447.4	1135	4032	158.1	5325.1	5.78	15	0.502392	191.923	38.3254	100	58.6653	41.3347	52.8518	0.337663	0.127165	0.22058	0.123433	0.214592	0.462519	0.290866	0.259439	0.457525	0.225084	0.0613693	0.281181	0.0812259	0.301176	0.0205393	0.0195558	0.225698	0.192744	13.2123	115.271
F83	DSH	Mn	83	364	d2	F	6.7	5.5	21.8182	16	6	4	1901	4204	173.1	6278.1	798	4159	151.5	5108.5	5.5	17.9104	0.344432	158.932	28.5934	100	51.4299	48.5701	47.9989	0.294789	0.111827	0.191601	0.109234	0.189978	0.401246	0.262886	0.225526	0.399278	0.197522	0.0542159	0.246704	0.0764897	0.25813	0.0173256	0.0179694	0.19409	0.165568	11.2945	102.347
F84	Long Haired Oriental	Mn	87	399	d2w1	F	9.6	7.1	35.2113	14	2	2	3255	5613	209.1	9077.1	1170	5239	175.9	6584.9	7.1	26.0417	0.456871	230.693	49.7619	100	64.8234	35.1766	57.4169	0.347966	0.130245	0.228273	0.12574	0.218532	0.479154	0.290876	0.268318	0.471639	0.230945	0.0626093	0.288547	0.0781808	0.315125	0.021766	0.0192645	0.235507	0.201302	13.8533	117.093
F85	DSH	Mn	178	54	d2	P	6.6	5.91	32	5	1	0	2097	3868	179.7	6144.7	NA	NA	NA	NA	5	10.4545	1.35522	178.289	52.5926	0	100	0	53.0086	0.312776	0.113138	0.20992	0.105844	0.183606	0.443092	0.217859	0.245913	0.424692	0.202632	0.0531661	0.253396	0.0431109	0.306657	0.022515	0.0129491	0.226059	0.194107	13.622	96.9124
F86	DLH	Mn	49	840	d2	F	7.4	5.6	32.1429	8	1	1	2249	4458	196.4	6903.4	765	4278	178.5	5221.5	5.6	24.3243	0.202703	188.69	55.6607	0	100	0	53.2815	0.306818	0.110983	0.205921	0.103828	0.180109	0.434653	0.21371	0.241229	0.416603	0.198773	0.0521534	0.24857	0.0422897	0.300816	0.0220862	0.0127025	0.221753	0.19041	13.3625	95.0665
F87	DSH	Mn	84	960	d2	F	9.3	6	69.0909	27	5	3	3739	4957	181.9	8877.9	1337	4114	160.9	5611.9	5.5	35.4839	0.258737	188.661	39.3469	82.5	61.7953	38.2047	55.0286	0.331115	0.124057	0.217074	0.119869	0.208339	0.455571	0.278116	0.255179	0.448775	0.219911	0.0596718	0.274755	0.0752215	0.299151	0.0206221	0.0184644	0.223664	0.191153	13.1468	111.676
F91	DSH	Mn	78	229	d2	F	6.5	4.6	41.3043	9	1	0	2138	3837	146.4	6121.4	540	3547	127.1	4214.1	4.6	29.2308	0.893517	157.302	46.4017	0	100	0	49.4559	0.291813	0.105555	0.195851	0.0987502	0.171301	0.413396	0.203258	0.229432	0.396229	0.189052	0.0496029	0.236413	0.0402215	0.286104	0.0210061	0.0120813	0.210909	0.181098	12.709	90.4173
F94	DSH	Mn	36	652	d2w1	F	9.08	6.71	56.5517	10	0	2	3325	4896	203.5	8424.5	NA	NA	NA	NA	5.8	26.1013	0.280229	185.02	18	200	24.9976	75.0024	54.6129	0.357977	0.139515	0.228199	0.139432	0.242817	0.475541	0.360431	0.269398	0.484154	0.244545	0.0687768	0.305226	0.11855	0.291351	0.0182519	0.0259473	0.222116	0.188621	12.6104	132.163
F96	DSH	Fn	87	163	d2	F	5.5	4.05	35.8025	5	1	0	1507	3469	127	5103	277	3284	110	3671	4.05	26.3636	1.13218	147.08	43.3865	0	100	0	49.1484	0.297152	0.107486	0.199434	0.100557	0.174434	0.420959	0.206976	0.233629	0.403478	0.19251	0.0505103	0.240738	0.0409573	0.291338	0.0213904	0.0123023	0.214767	0.184411	12.9415	92.0714
F97	DSH	Mn	84	512	d2	P	10.5	6.64	133.333	13	0	0	5457	4391	186.6	10034.6	2024	3943	165.8	6132.8	4.5	36.7619	0.502604	203.4	60	0	100	0	64.8979	0.382928	0.138514	0.257003	0.129584	0.224787	0.542473	0.266723	0.301069	0.519946	0.24808	0.0650907	0.31023	0.0527802	0.375437	0.0275649	0.0158535	0.276762	0.237643	16.6773	118.649
F99	DSH	Mn	96	184	d2	F	6.4	5.2	23.0769	7	0	0	1792	4095	143.2	6030.2	682	3970	125.1	4777.1	5.2	18.75	0.713315	169.5	50	0	100	0	50.3955	0.289645	0.104771	0.194396	0.0980165	0.170028	0.410324	0.201748	0.227727	0.393285	0.187647	0.0492343	0.234657	0.0399227	0.283979	0.02085	0.0119915	0.209341	0.179752	12.6146	89.7455
F100	Bengal X	Mn	121	162	d2	P	9.1	6.7	59.6491	8	0	0	3703	4707	201.3	8611.3	1482	4593	180.9	6255.9	5.7	26.3736	1.1396	193.23	57	0	100	0	52.6224	0.310497	0.112314	0.20839	0.105073	0.182268	0.439864	0.216272	0.244121	0.421598	0.201156	0.0527787	0.25155	0.0427967	0.304422	0.022351	0.0128548	0.224412	0.192693	13.5227	96.2063
F105	DSH	Fn	110	594	d2w1	F	6.8	4.6	47.8261	16	0	1	2688	3608	109.5	6405.5	753	3289	92.4	4134.4	4.6	32.3529	0.381264	146.75	25	100	45.8833	54.1167	51.21	0.309683	0.117875	0.200802	0.11548	0.200874	0.420265	0.280581	0.236442	0.419375	0.208004	0.05727	0.259773	0.0831033	0.268804	0.0179024	0.0193192	0.202442	0.172602	11.7468	108.362
F106	DSH	Mn	110	594	d2w1	F	9.1	6.03	50.9121	14	0	1	3495	4836	168.1	8499.1	927	4528	141.9	5596.9	6.03	33.7363	0.397565	197.6	40	100	57.5655	42.4345	55.5941	0.337003	0.126786	0.220306	0.122953	0.213746	0.462027	0.288849	0.259089	0.456656	0.22448	0.061146	0.280433	0.0801647	0.301365	0.0205972	0.0193725	0.225734	0.192805	13.2253	114.769
F110	DSH	Mn	19	190	d2w1	F	6.6	5.26	25.4753	7	0	0	1579	4287	162.5	6028.5	423	4127	150.2	4700.2	5.26	20.303	0.748006	177.26	34	100	53.5551	46.4449	52.577	0.334814	0.126462	0.218274	0.123067	0.213987	0.457451	0.292512	0.256806	0.453594	0.223651	0.0611441	0.27937	0.0830947	0.296435	0.0200886	0.0198014	0.222442	0.18988	12.9909	115.082
F111	DSH	Mn	153	149	d2w1	P	7.2	5.98	80	5	0	0	3337	3447	120.7	6904.7	2456	2983	122.7	5561.7	4	16.9444	0.796048	129.8	20	100	40.4154	59.5846	47.9002	0.305552	0.116955	0.197339	0.115131	0.200323	0.412602	0.284072	0.232503	0.413656	0.206052	0.0570223	0.257299	0.0865016	0.261336	0.0171741	0.0197861	0.197357	0.168115	11.3961	108.3
F113	DSH	Mn	135	84	d2w1	P	6.4	5.36	33.3333	4	0	0	2079	3727	118.2	5924.2	1382	3409	116.9	4907.9	4.8	16.25	1.35417	156.92	28	100	48.7075	51.2925	50.6791	0.319313	0.121194	0.207464	0.118439	0.205991	0.434426	0.285465	0.244212	0.432483	0.214036	0.0587768	0.267326	0.0832944	0.279225	0.0187191	0.0195352	0.210003	0.179129	12.2152	110.997
F114	DSH	Fn	111	482	d2	P	7.2	5.18	105.714	8	3	0	3494	3157	128.6	6779.6	1599	2895	114.1	4608.1	3.5	28.0556	0.407446	133.044	20.9569	100	41.5458	58.4542	53.6081	0.341376	0.130516	0.220658	0.128352	0.223314	0.461456	0.315693	0.259946	0.462184	0.230018	0.0635876	0.287234	0.0955935	0.29288	0.0193017	0.0219371	0.221052	0.188334	12.7774	120.675
F116	DSH	Mn	96	244	d2	F	9.2	5.7	61.4035	12	0	0	3654	4880	220.7	8754.7	622	4545	186	5353	5.7	38.0435	1.09141	203.4	60	0	100	0	54.1268	0.326839	0.118225	0.219358	0.110603	0.191861	0.463015	0.227654	0.25697	0.443787	0.211743	0.0555565	0.264789	0.0450492	0.320445	0.0235274	0.0135314	0.236223	0.202835	14.2345	101.27
F119	DSH	Fn	129	287	d2	F	6.9	4.59	50.3268	9	1	0	2730	3751	114.6	6595.6	797	3283	101.7	4181.7	4.59	33.4783	0.816543	145.463	42.9094	0	100	0	46.4122	0.270244	0.0977534	0.181375	0.0914512	0.158639	0.38284	0.188234	0.212474	0.366942	0.175078	0.0459365	0.218939	0.0372486	0.264957	0.0194534	0.0111883	0.195319	0.167712	11.7697	83.7342
F121	DSH	Fn	76	132	d2w2	F	6.4	5.1	25.4902	4	0	0	1886	4050	124.9	6060.9	1020	3630	116.6	4766.6	5.1	20.3125	1.07718	159.5	30	85	54.4829	45.5171	49.8121	0.304696	0.115273	0.197887	0.108662	0.19033	0.419093	0.265321	0.234067	0.408614	0.205957	0.0561635	0.255444	0.0600005	0.294781	0.0211424	0.0200277	0.203795	0.170356	11.0562	100.316
F125	DSH	Fn	145	460	d2	P	6.3	3.71	90.9091	5	1	0	2910	2792	103.6	5805.6	NA	NA	NA	NA	3.3	41.1111	0.625604	116.564	34.3848	0	100	0	45.7819	0.270135	0.0977138	0.181301	0.0914141	0.158575	0.382685	0.188158	0.212388	0.366793	0.175007	0.0459179	0.21885	0.0372335	0.26485	0.0194455	0.0111838	0.19524	0.167644	11.7649	83.7002
F132	DSH	Fn	21	172	d2	F	4.4	3.65	22.2222	6	2	0	1238	2643	95.7	3976.7	NA	NA	NA	NA	3.6	17.0455	0.69371	140.37	41.407	0	100	0	52.0095	0.30688	0.111006	0.205963	0.103849	0.180145	0.434741	0.213753	0.241278	0.416687	0.198813	0.052164	0.24862	0.0422983	0.300877	0.0220907	0.0127051	0.221798	0.190449	13.3652	95.0858
F137	DSH	Mn	58	410	d2	F	8.3	5.05	69.3878	13	1	2	NA	NA	NA	NA	NA	NA	NA	NA	4.9	39.1566	0.668528	166.717	41.7478	37.0465	79.2609	20.7391	56.7112	0.305804	0.112696	0.20274	0.107278	0.186291	0.426666	0.236042	0.237932	0.41483	0.200735	0.0536251	0.250903	0.0565031	0.287457	0.0149681	0.0238125	0.213428	0.182826	12.7003	99.1584
F138	DSH	Mn	109	194	d2w2	P	8.5	7.2	54.5455	7	0	2	NA	NA	NA	NA	NA	NA	NA	NA	5.5	15.2941	0.55185	249.864	49.562	120.365	58.272	41.728	79.737	0.449686	0.16947	0.292908	0.159649	0.279411	0.620145	0.384691	0.346159	0.603714	0.302852	0.0823221	0.375883	0.0862176	0.435565	0.0285967	0.0283452	0.3029	0.253848	16.6043	147.286
F144	Maine Coon cross	Mn	126	204	d2w2	P	8.22	6.21	64.4	6	0	0	NA	NA	NA	NA	NA	NA	NA	NA	5	24.4526	0.839058	159.5	30	85	54.4829	45.5171	54.2564	0.308766	0.116813	0.20053	0.110114	0.192872	0.42469	0.268865	0.237193	0.414071	0.208708	0.0569136	0.258856	0.0608019	0.298718	0.0202952	0.018617	0.206517	0.172631	11.2038	101.656
F107	DSH	Fn	86	304	d2w1	F	5.4	4.6	12.5	7	1	2	NA	NA	NA	NA	NA	NA	NA	NA	4.8	14.8148	0.341131	170.525	32.0132	100	52.0546	47.9454	59.615	0.343842	0.130066	0.223926	0.126739	0.22039	0.469174	0.30255	0.263497	0.465788	0.229926	0.0629463	0.287197	0.0866753	0.303274	0.0205508	0.0200669	0.227731	0.194351	13.2834	118.597
F118	DSH	Fn	103	141	d2	P	6.45	4.8	61.25	6	0	1	NA	NA	NA	NA	NA	NA	NA	NA	4	25.5814	1.27	125.6	20	85	44.3822	55.6178	49.6146	0.280438	0.106907	0.181643	0.104872	0.182437	0.380063	0.255893	0.213917	0.37974	0.188566	0.0519907	0.235489	0.0763821	0.242449	0.0176759	0.0147177	0.182728	0.155756	10.589	98.4744
[truncated: 20 more columns]
